# Supplementary material
Source: PubMed Central journal article supplement (PMC5210726)
Supplement: supp_pp.16.01275_PP2016-01275R1_Supplemental_Material.pdf [file supp_pp.16.01275_PP2016-01275R1_Supplemental_Material.pdf]

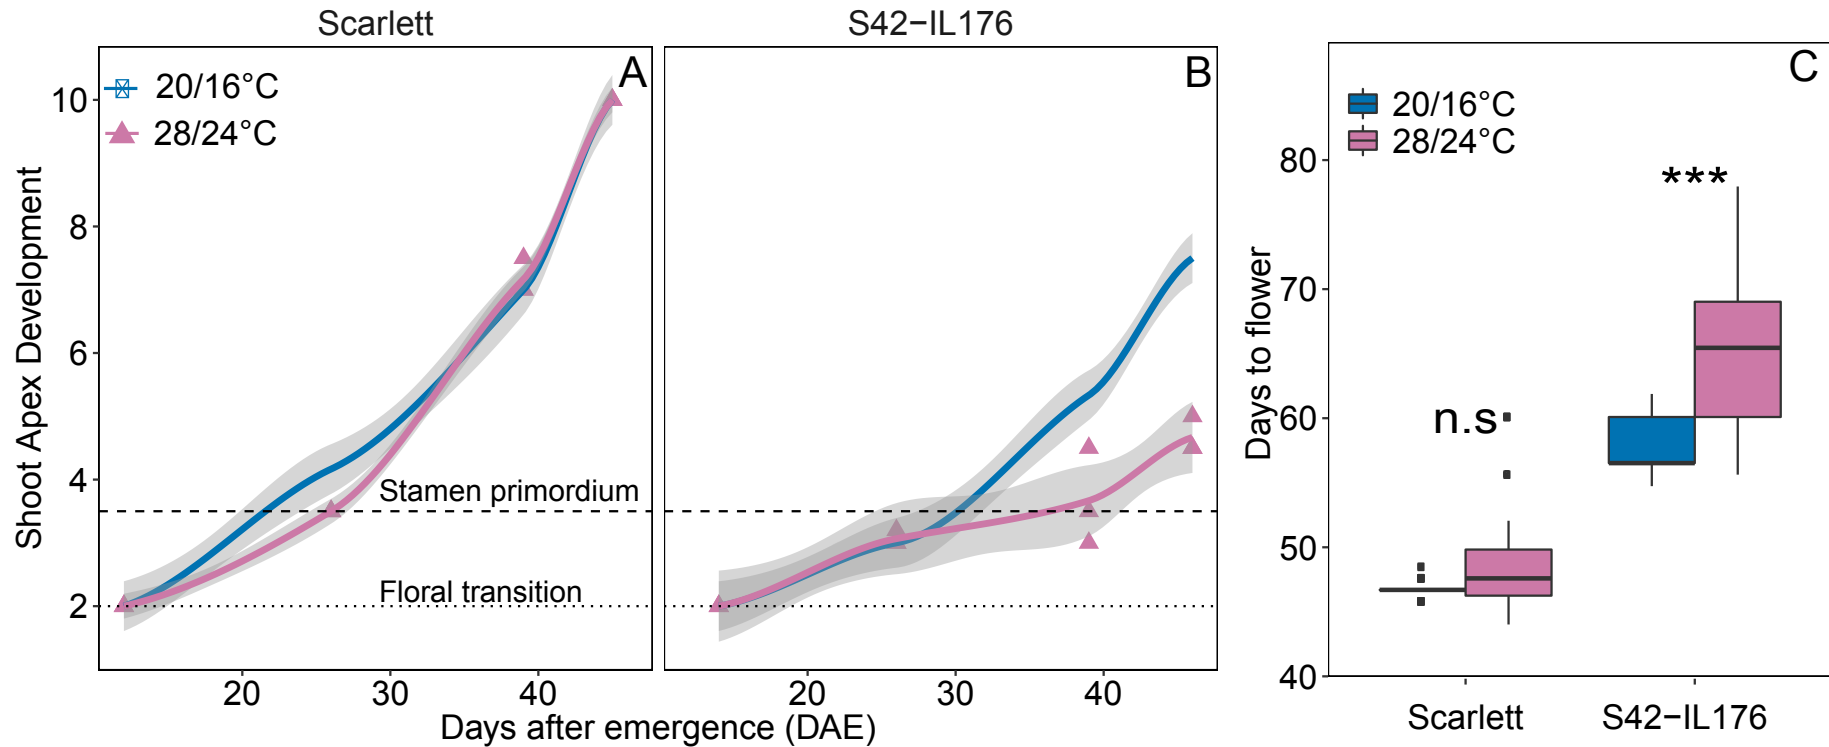

**Supplementary Figure 1: *HvVRN1* affects reproductive development in response to ambient temperature after floral transition.** Development of the main shoot apex (MSA) was scored under control (blue) and high ambient (pink) temperatures every ten days according to the Waddington scale (Waddington et al., 1983). MSA development was not affected under high compared to control temperatures in Scarlett (A) and delayed inflorescence development in the derived introgression line S42-IL176 (*Hvvrn1*) (B). Plants were grown at control temperature (blue, 20/16°C, day/night) and transferred to high temperature (pink, 28/24°C, day/night) at floral transition (W2.0). 3-4 plants per genotype were dissected at each time point in each treatment under long days (16h light/8h night). Statistical differences were calculated using a polynomial regression model at a 95% confidence interval (Loess smooth line). (C) Days to flowering of the MSA under control (blue, 20/16°C, day/night) and high ambient temperatures (pink, 28/24°C, day/night) in the spring barley variety Scarlett and the derived introgression line S42-IL176 (*Hvvrn1*). Flowering time was recorded for 6-8 plants per genotype and treatment. Statistical differences were calculated by an ANOVA and a posthoc Tukeys HSD pairwise comparison test: \*P < 0.05, \*\*P < 0.01, \*\*\*P < 0.001, n.s.=non-significant.

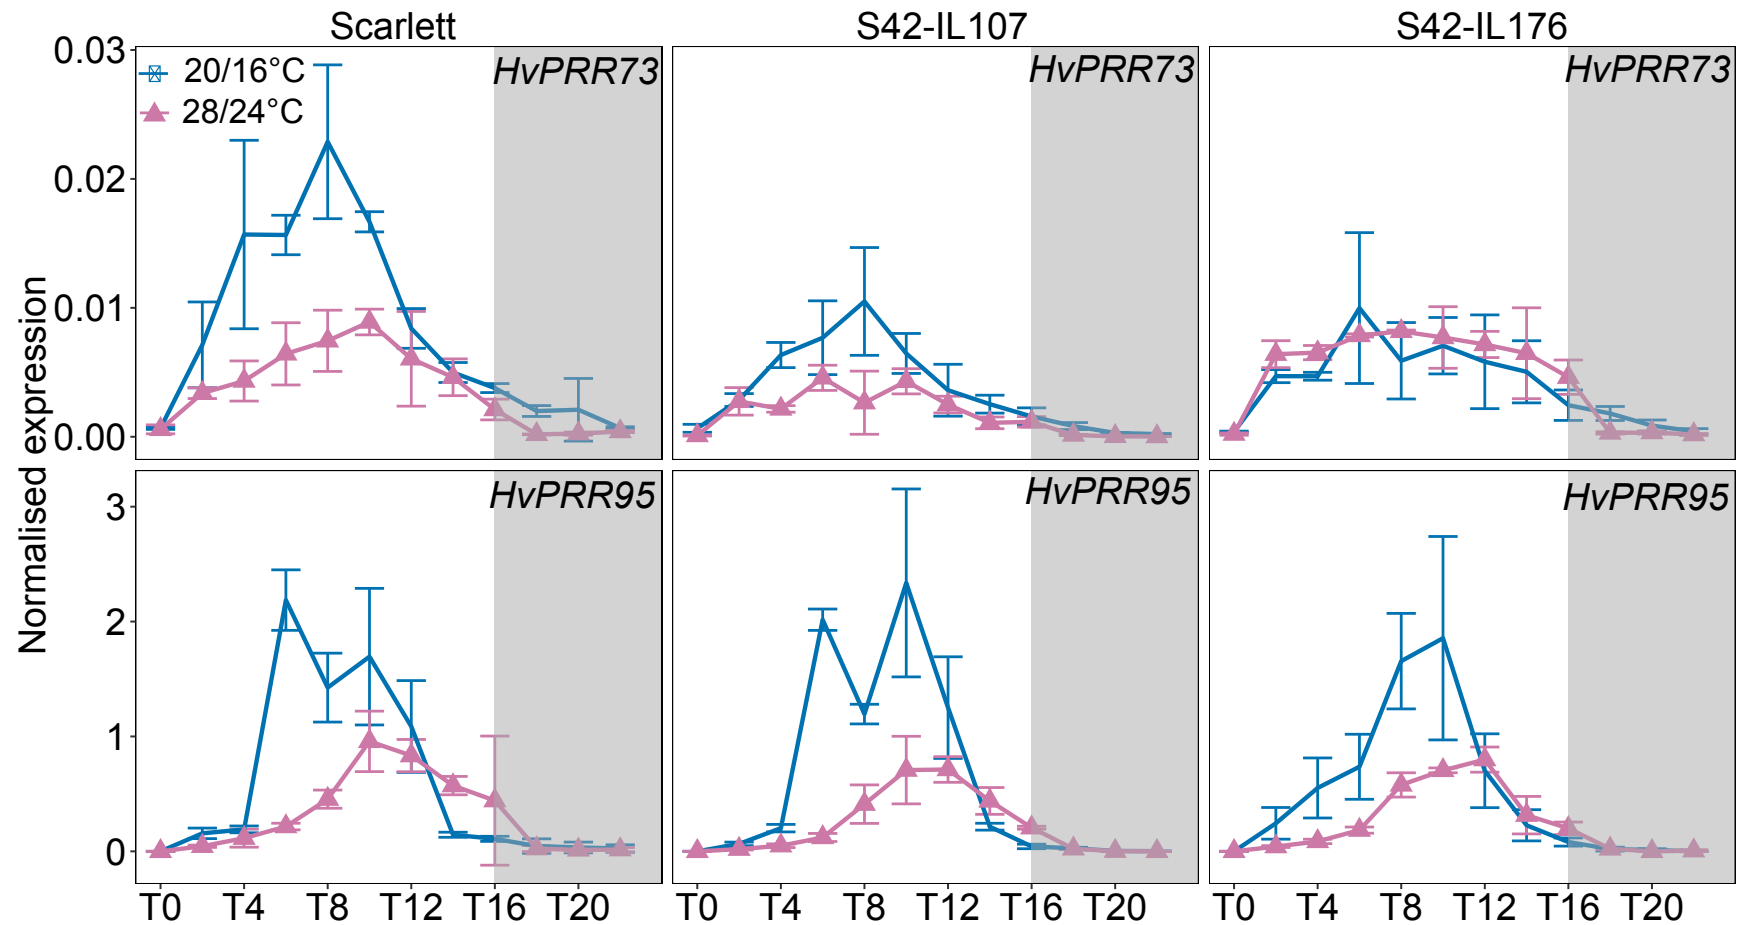

Supplementary Figure 2: Diurnal expression of circadian clock genes *HvPRR73* and *HvPRR95* in Scarlett, S42-IL107, and S42-IL176 under control and high ambient temperatures. Gene expression was assayed every two hours for 24 hours under control (blue, 20/16°C, day/night) and high ambient (pink, 28/24°C, day/night) temperatures under long days (16h light/8h night). Grey boxes indicate nights. Error bars indicate  $\pm$ SD of three biological replicates.

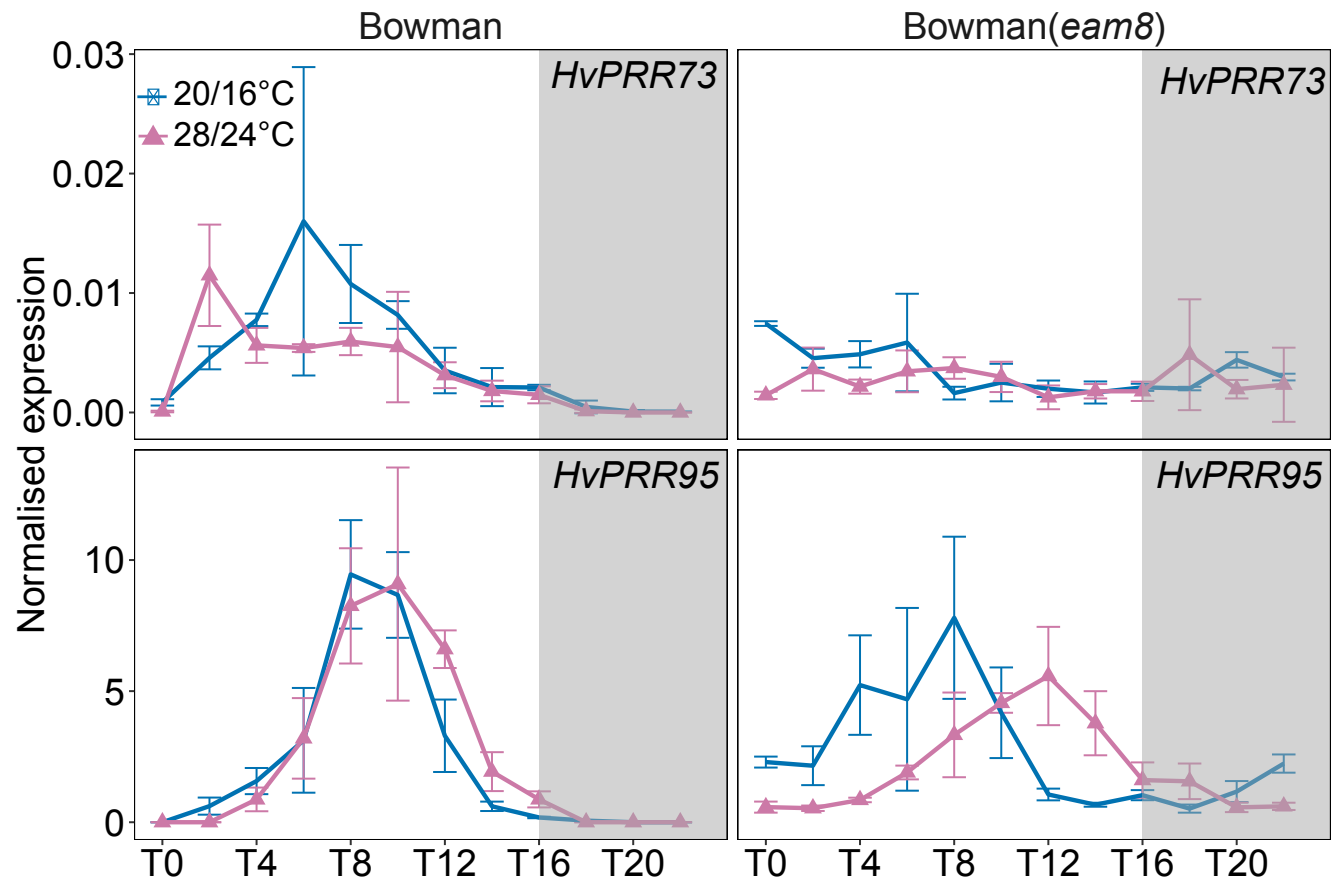

**Supplementary Figure 3: Diurnal expression of circadian clock genes *HvPRR73* and *HvPRR95* in Bowman and Bowman(*eam8*) under control and high ambient temperatures** Gene expression was assayed every two hours for 24 hours under control (blue, 20/16°C, day/night) and high ambient (pink, 28/24°C, day/night) temperatures under long days (16h light/8h night). Grey boxes indicate nights. Error bars indicate  $\pm$ SD of three biological replicates.

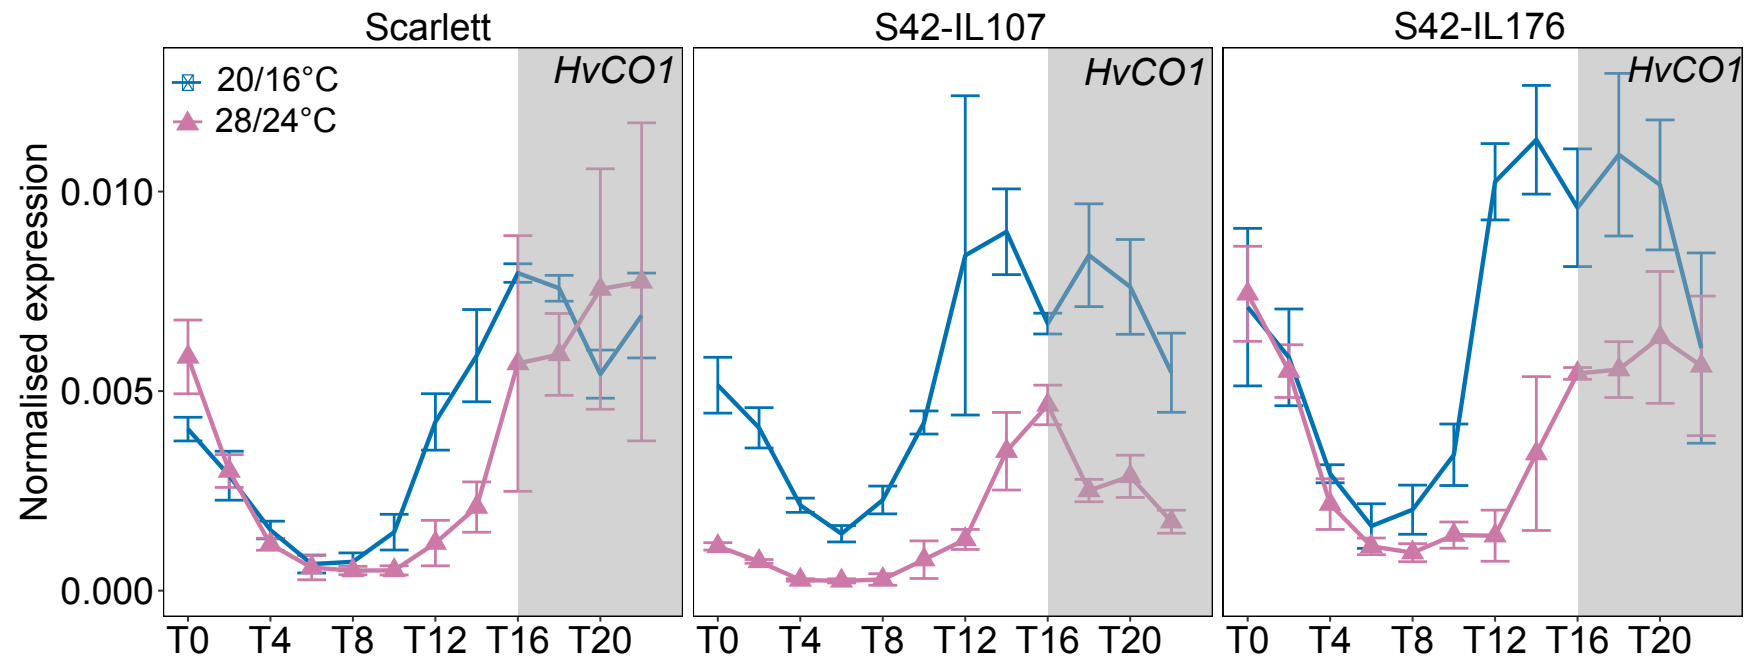

**Supplementary Figure 4: High ambient temperature downregulates the expression of flowering time gene *HvCO1* in Scarlett, S42-IL107, and S42-IL176.** Diurnal expression of *HvCO1* was assayed every two hours for 24 hours under control (blue, 20/16°C, day/night) and high ambient (pink, 28/24°C, day/night) temperatures under long days (16h light/8h night). Grey boxes indicate nights. Error bars indicate  $\pm$ SD of three biological replicates.

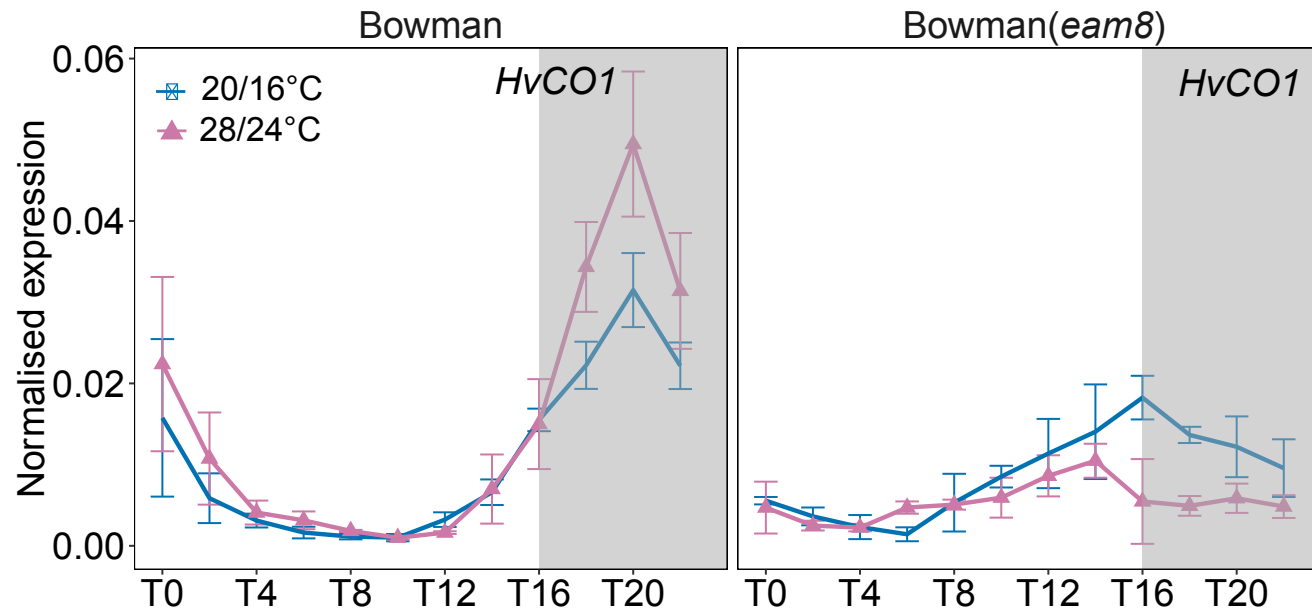

**Supplementary Figure 5: Effect of high ambient temperature on diurnal expression of flowering time gene *HvCO1* in Bowman and Bowman(*eam8*).** Diurnal expression of *HvCO1* was assayed every two hours for 24 hours under control (blue, 20/16°C, day/night) and high ambient (pink, 28/24°C, day/night) temperatures under long days (16h light/8h night). Grey boxes indicate nights. Error bars indicate  $\pm$ SD of three biological replicates.

**Supplementary Table 1:** A) Two-factorial ANOVA, F values and significances (\*\*p<0.01, \*\*\*p<0.001, ns = non-significant) and B) Least square means for heading date, floret and seed number for each genotype (P = Parental genotype, Scarlett or Bowman, V = Introgression line for *HvELF3*, *PPD-H1* or *HvVRN1*) by environment combination (C = Control, H= High ambient temperatures). Small letters indicate significant differences (p<0.05).

A

| Factor                     | Heading<br>F Value | Floret number<br>F Value | Seed number<br>F Value |
|----------------------------|--------------------|--------------------------|------------------------|
| <b><i>HvELF3</i></b>       |                    |                          |                        |
| Temperature                | 44***              | 27***                    | 10**                   |
| <i>HvELF3</i>              | 1102***            | 310***                   | 15***                  |
| <i>HvELF3</i> *Temp        | 178***             | 22***                    | 15***                  |
| <b><i>PPD-H1</i></b>       |                    |                          |                        |
| Temperature                | 50***              | 35***                    | 53***                  |
| <i>PPD-H1</i>              | 2098***            | 117***                   | 12***                  |
| <i>PPD-H1</i> *Temperature | 189***             | 10***                    | 19***                  |
| <b><i>HvVRN1</i></b>       |                    |                          |                        |
| Temperature                | 6995***            | 732***                   | 363***                 |
| <i>HvVRN1</i>              | 6131***            | 236***                   | 23***                  |
| <i>HvVRN1</i> *Temp        | 4617***            | 235***                   | 1 ns                   |

B

| Factor               | P/C             | P/H             | V/C               | V/H               |
|----------------------|-----------------|-----------------|-------------------|-------------------|
| <b><i>HvELF3</i></b> |                 |                 |                   |                   |
| Heading              | 40 <sup>a</sup> | 51 <sup>c</sup> | 29.8 <sup>b</sup> | 26 <sup>d</sup>   |
| Floret number        | 21 <sup>a</sup> | 17 <sup>c</sup> | 13 <sup>b</sup>   | 13 <sup>b</sup>   |
| Seed number          | 9 <sup>a</sup>  | 3 <sup>b</sup>  | 9 <sup>a</sup>    | 9 <sup>a</sup>    |
| <b><i>PPD-H1</i></b> |                 |                 |                   |                   |
| Heading              | 42 <sup>a</sup> | 52 <sup>b</sup> | 26 <sup>c</sup>   | 23 <sup>d</sup>   |
| Floret number        | 26 <sup>a</sup> | 19 <sup>c</sup> | 16 <sup>b</sup>   | 14 <sup>b</sup>   |
| Seed number          | 15 <sup>a</sup> | 4 <sup>c</sup>  | 14 <sup>ab</sup>  | 11 <sup>b</sup>   |
| <b><i>HvVRN1</i></b> |                 |                 |                   |                   |
| Heading              | 46 <sup>a</sup> | 56 <sup>c</sup> | 52 <sup>b</sup>   | >106 <sup>d</sup> |
| Floret number        | 30 <sup>a</sup> | 22 <sup>b</sup> | 30 <sup>a</sup>   | 0 <sup>c</sup>    |
| Seed number          | 23 <sup>a</sup> | 5 <sup>c</sup>  | 19 <sup>b</sup>   | 0 <sup>d</sup>    |

**Supplementary Table 2: List of q-PCR primers used in this study.**

| <b>Gene ID</b> | <b>Gene name</b>                  | <b>Forward primer sequence</b> | <b>Reverse primer sequence</b>  | <b>Source</b>        |
|----------------|-----------------------------------|--------------------------------|---------------------------------|----------------------|
| AY145451       | <i>HvACTIN</i>                    | CGT GTT GGA TTC TGG TGA TG     | AGC CAC ATA TGC GAG CTT CT      | Campoli et al.2012a  |
| AJ249143       | <i>HvBM3</i>                      | GCC GTC ACC AGC ACA AGC AA     | CCC CAT TCA CCC TGT AGC AAA GA  | Digel et al. 2015    |
| AJ249146       | <i>HvBM8</i>                      | CCA CAG CAG CCG ACA CCT A      | TGC CTT TGG GGG AGA AGA CG      | Digel et al. 2015    |
| JN603242       | <i>HvCCA1</i>                     | CCT GGA ATT GGA GAT GGA GA     | TGA GCA TGG CTT CTG ATT TG      | Campoli et al.2012b  |
| AF490468       | <i>HvCO1</i>                      | CTG CTG GGG CTA GTG CTT AC     | CCT TGT TGC ATA ACG TGT GG      | Campoli et al.2012a  |
| DQ100327       | <i>HvFT1</i>                      | GGT AGA CCC AGA TGC TCC AA     | TCG TAG CAC ATC ACC TCC TG      | Campoli et al.2012a  |
| AK362208       | <i>HvGAPDH</i>                    | GTG AGG CTG GTG CTG ATT ACG    | AGT GGT GCA GCT AGC ATT TGA GAC | unpublished          |
| AY740524       | <i>HvGI</i>                       | TCA GTT AGA GCT CCT GGA AGT    | GGT AGT TTG GGC TTT GGA TG      | Campoli et al.2012b  |
| Hv.20312       | <i>HvLUX1</i>                     | AAT TCA GTC CAC GGA TGC TC     | CTT CAC TTC AGC TCC CCT TG      | Campoli et al.2012   |
| HM130525       | <i>HvOS2</i>                      | CAA TGC TGA TGA CTC AGA TGC T  | CGCTATTTTCGTTGCGCCAAT           | Green up et al. 2010 |
| JN603243       | <i>HvPRR1</i>                     | GAG CAT AGC ATG GCA CTT CA     | TGT CTT TCC TCG GAA ATT GG      | Campoli et al.2012b  |
| AK361360       | <i>HvPRR59</i>                    | GAA ATT CCG CAT GAA AAG GA     | TTC CGC ATC TTC TGT TGT TG      | Campoli et al.2012b  |
| AK376549       | <i>HvPRR73</i>                    | GCG CCG TAG AGA ATC AGA AC     | CAT GTC GGG TAC AGT CAT CG      | Campoli et al.2012b  |
| AK252005       | <i>HvPRR95</i>                    | CAG AAC TCC AGT GTC GCA AA     | TGC TGT TGC CAG AGT TGT TC      | Campoli et al.2012b  |
| Y09741         | <i>Hv<math>\beta</math>TUBLIN</i> | GTG CAT GGT TCT TGA CAA CG     | GCA TGT GAC TCC ACT CAT GG      | unpublished          |
| AY750995       | <i>HvVRN1</i>                     | CTG AAG GCG AAG GTT GAG AC     | TTC TCC TCC TGC AGT GAC CT      | Campoli et al.2012a  |
| AY970701       | <i>PPD-H1</i>                     | GAT GGA TTC AAA GGC AAG GA     | GAA CAA TTG GCT CCT CCA AA      | Campoli et al.2012a  |
